# Supplementary material for: Role of α-Catenin and its mechanosensing properties in regulating Hippo/YAP-dependent tissue growth
Source: PubMed Central journal article supplement (PMC6863567; doi:10.1371/journal.pgen.1008454), 2019-11-07
Supplement: pgen.1008454.s008.pdf [file pgen.1008454.s008.pdf]

## S1 Table. List of genotypes

### Fig 1

#### B

Gal80, ubi- $\alpha$ Cat, FRT40A/hsFLP ; Act-Gal4,  $\alpha$ -Cat/da-Gal4,UAS-GFP,  $\alpha$ -Cat

Gal80, ubi- $\alpha$ Cat, FRT40A/hsFLP; act-Gal4,  $\alpha$ -Cat, UAS-P35/da-Gal4, UAS-GFP,  $\alpha$ -Cat

#### C

en-Gal4, UAS-RFP/+ ; UAS- $\alpha$ -Cat-RNAi(1)/ +

en-Gal4, UAS-RFP/+ ; UAS- $\alpha$ -Cat-RNAi(1),  $\alpha$ -Cat/+

#### D

en-Gal4, UAS-RFP/+ ; UAS- $\alpha$ -Cat-RNAi(1)/UAS-P35

en-Gal4, UAS-RFP/+ ; UAS- $\alpha$ -Cat-RNAi(1),  $\alpha$ -Cat/UAS-P35

#### E

en-Gal4, UAS-RFP/+

en-Gal4, UAS-RFP/+; UAS- $\alpha$ -Cat-RNAi(1)/ +

en-Gal4, UAS-RFP/+; UAS- $\alpha$ -Cat-RNAi(1)/ UAS-P35

en-Gal4, UAS-RFP/+; UAS- $\alpha$ -Cat-RNAi(1),  $\alpha$ -Cat/+

en-Gal4, UAS-RFP/+; UAS- $\alpha$ -Cat-RNAi(1),  $\alpha$ -Cat/ $\alpha$ -CatR

en-Gal4, UAS-RFP/+; UAS- $\alpha$ -Cat-RNAi(2)/+

en-Gal4, UAS-RFP/+; UAS- $\alpha$ -Cat-RNAi(2)/ $\alpha$ -CatR

### Fig 2

#### A

en-Gal4, UAS-RFP/+; Puc<sup>E697</sup>-lacZ/+

en-Gal4, UAS-RFP/+; UAS- $\alpha$ -Cat-RNAi(1)/ Puc<sup>E697</sup>-lacZ

en-Gal4, UAS-RFP/Rho1<sup>720</sup>/+; UAS- $\alpha$ -Cat-RNAi(1)/ Puc<sup>E697</sup>-lacZ

en-Gal4, UAS-RFP/+; UAS- $\alpha$ -Cat-RNAi(1), UAS-P35/ Puc<sup>E697</sup>-lacZ

#### C

en-Gal4, UAS-RFP, ex-lacZ/+; UAS- $\alpha$ -Cat-RNAi(1)/+

en-Gal4, UAS-RFP, ex-lacZ/+; UAS- $\alpha$ -Cat-RNAi(1), UAS-P35/+

en-Gal4, UAS-RFP/yki<sup>B5</sup>

en-Gal4, UAS-RFP/yki<sup>B5</sup>; UAS- $\alpha$ -Cat-RNAi(1)/+

#### D

en-Gal4, UAS-RFP/+

en-Gal4, UAS-RFP/yki<sup>B5</sup>

en-Gal4, UAS-RFP/+; UAS- $\alpha$ -Cat-RNAi(1)/ +

en-Gal4, UAS-RFP/yki<sup>B5</sup>; UAS- $\alpha$ -Cat-RNAi(1)/+

**Fig 3****A**

en-Gal4, UAS-RFP, ex-lacZ/+;

en-Gal4, UAS-RFP, ex-lacZ/UAS-DEcad-RNAi

en-Gal4, UAS-RFP, ex-lacZ/UAS-DEcad-RNAi; UAS-P35/+

**B**en-Gal4, UAS-RFP/+; Puc<sup>E697</sup>-lacZ/+en-Gal4, UAS-RFP/UAS-DEcad-RNAi; Puc<sup>E697</sup>-lacZ/+en-Gal4, UAS-RFP/UAS-DEcad-RNAi; Puc<sup>E697</sup>-lacZ/UAS-P35**C**

en-Gal4, UAS-RFP, ex-lacZ/+

en-Gal4, UAS-RFP, ex-lacZ/UAS-DEcad-RNAi

en-Gal4, UAS-RFP, ex-lacZ/UAS-DEcad-RNAi; UAS-P35/+

**D**en-Gal4, UAS-RFP/+; UAS- $\alpha$ -Cat-RNAi(1),  $\alpha$ -Cat/+en-Gal4, UAS-RFP/+; UAS- $\alpha$ -Cat-RNAi(1),  $\alpha$ -Cat/UAS-DEcad:: $\alpha$ -Cat**E**

en-Gal4, UAS-RFP/+

en-Gal4, UAS-RFP/+; UAS- $\alpha$ -Cat-RNAi(1),  $\alpha$ -Cat/+en-Gal4, UAS-RFP/+; UAS- $\alpha$ -Cat-RNAi(1),  $\alpha$ -Cat1/UAS-DEcad:: $\alpha$ -Cat**Fig 4****B**en-Gal4, UAS-RFP/+; Jub::**GFP**/+**C**en-Gal4, UAS-RFP/+; Jub::**GFP**/+; UAS- $\alpha$ -Cat-RNAi(1)/+**D**en-Gal4, UAS-RFP/+; Jub::**GFP**/+; UAS- $\alpha$ -Cat-RNAi(1)/UAS-DEcad:: $\alpha$ -Cat**E**en-Gal4, UAS-RFP/+; Jub::**GFP**/+; UAS- $\alpha$ -Cat-RNAi(1)/UAS-DEcad $\Delta\beta$ :: $\alpha$ -Cat $\Delta$ N**F**

en-Gal4, UAS-RFP/+

en-Gal4, UAS-RFP/+; UAS- $\alpha$ -Cat-RNAi(1)/+en-Gal4, UAS-RFP/+; UAS- $\alpha$ -Cat-RNAi(1)/UAS-DEcad:: $\alpha$ -Caten-Gal4, UAS-RFP/+; UAS- $\alpha$ -Cat-RNAi(1)/UAS-DEcad $\Delta\beta$ :: $\alpha$ -Cat $\Delta$ N

**Fig 5****A**

omb-Gal4/+  
omb-Gal4/+; UAS- $\alpha$ -Cat-RNAi(1)/+  
omb-Gal4/+; UAS- $\alpha$ -Cat  
yki<sup>ts</sup>/+  
omb-Gal4/+; yki<sup>ts</sup>/+; UAS- $\alpha$ -Cat/+  
omb-Gal4/+; Jub-RNAi/+  
omb-Gal4/+; Jub-RNAi/+; UAS- $\alpha$ -Cat/+

**B**

omb-Gal4/+  
yki<sup>ts</sup>/+  
omb-Gal4/+; UAS- $\alpha$ -Cat/+  
omb-Gal4/+; yki<sup>ts</sup>/+; UAS- $\alpha$ -Cat/+  
omb-Gal4/+; Jub-RNAi/+  
omb-Gal4/+; Jub-RNAi/+; UAS- $\alpha$ -Cat/+

**C**

en-Gal4, UAS-RFP, ex-lacZ/+  
en-Gal4, UAS-RFP, ex-lacZ/+; UAS-ft-RNAi/+  
en-Gal4, UAS-RFP, ex-lacZ/+; UAS- $\alpha$ -Cat/+  
en-Gal4, UAS-RFP, ex-lacZ/+; UAS-ft-RNAi/ UAS- $\alpha$ -Cat  
en-Gal4, UAS-RFP, ex-lacZ/+; yki<sup>ts</sup>/+; UAS- $\alpha$ -Cat/UAS-ft-RNAi

**D**

en-Gal4, UAS-RFP, ex-lacZ/+  
en-Gal4, UAS-RFP, ex-lacZ/+; UAS-ft-RNAi/+  
en-Gal4, UAS-RFP, ex-lacZ/+; UAS-ft-RNAi/ UAS- $\alpha$ -Cat  
en-Gal4, UAS-RFP, ex-lacZ/+; UAS-crb-RNAi/+  
en-Gal4, UAS-RFP, ex-lacZ/+; UAS-crb-RNAi/ UAS- $\alpha$ -Cat  
en-Gal4, UAS-RFP, ex-lacZ/+; UAS-ex-RNAi/+  
en-Gal4, UAS-RFP, ex-lacZ/+; UAS-ex-RNAi/UAS- $\alpha$ -Cat

**Fig 6****A**

en-Gal4, UAS-RFP/+  
en-Gal4, UAS-RFP/+; UAS- $\alpha$ -Cat-RNAi(2)/+  
en-Gal4, UAS-RFP/+; UAS- $\alpha$ -Cat-RNAi(2)/ UAS- $\alpha$ -CatR  
en-Gal4, UAS-RFP/+; UAS- $\alpha$ -Cat-RNAi(2)/ UAS- $\alpha$ -CatR- $\Delta$ M  
en-Gal4, UAS-RFP/+; UAS- $\alpha$ -Cat-RNAi(2)/ UAS- $\alpha$ -CatR- $\Delta$ M1  
en-Gal4, UAS-RFP/+; UAS- $\alpha$ -Cat-RNAi(2)/ UAS- $\alpha$ -Cat- $\Delta$ M2

en-Gal4, UAS-RFP/+; UAS- $\alpha$ -Cat-RNAi(2)/ UAS- $\alpha$ -CatR- $\Delta$ M3

**B**

omb-Gal4/+

omb-Gal4/+; UAS- $\alpha$ -CatR- $\Delta$ M1/+

yki<sup>ts</sup>/+

omb-Gal4/+; yki<sup>ts</sup>/+; UAS- $\alpha$ -CatR- $\Delta$ M1/+

omb-Gal4/+; Jub-RNAi/+

omb-Gal4/+; Jub-RNAi/+; UAS- $\alpha$ -CatR- $\Delta$ M1/+

**C**

en-Gal4, UAS-RFP/+

en-Gal4, UAS-RFP/+; UAS- $\alpha$ -Cat-RNAi(2)/+

en-Gal4, UAS-RFP/+; UAS- $\alpha$ -Cat-RNAi(2)/ UAS- $\alpha$ -CatR- $\Delta$ M

en-Gal4, UAS-RFP/+; UAS- $\alpha$ -Cat-RNAi(2)/ UAS- $\alpha$ -CatR- $\Delta$ M1

en-Gal4, UAS-RFP/+; UAS- $\alpha$ -Cat-RNAi(2)/ UAS- $\alpha$ -Cat- $\Delta$ M2

en-Gal4, UAS-RFP/+; UAS- $\alpha$ -Cat-RNAi(2)/ UAS- $\alpha$ -CatR- $\Delta$ M3

**D**

omb-Gal4/+

omb-Gal4/+; UAS- $\alpha$ -CatR- $\Delta$ M1/+

yki<sup>ts</sup>/+

omb-Gal4/+; yki<sup>ts</sup>/+; UAS- $\alpha$ -CatR- $\Delta$ M1/+

omb-Gal4/+; Jub-RNAi/+

omb-Gal4/+; JubRNAi/+; UAS- $\alpha$ -CatR- $\Delta$ M1/+

**E**

en-Gal4, UAS-RFP/+

en-Gal4, UAS-RFP/+; UAS- $\alpha$ -Cat-RNAi(2)/ UAS- $\alpha$ -CatR- $\Delta$ M

**F**

en-Gal4, UAS-RFP, *ex-LacZ*/+; UAS- $\alpha$ -Cat-RNAi(2)/ UAS- $\alpha$ -CatR- $\Delta$ M

**Fig 7**

**A**

en-Gal4, UAS-RFP/+; Jub::*GFP*/+; UAS- $\alpha$ -Cat-RNAi(2)/ UAS- $\alpha$ -CatR

**B**

en-Gal4, UAS-RFP/+; Jub::*GFP*/+; UAS- $\alpha$ -Cat-RNAi(2)/ UAS- $\alpha$ -CatR- $\Delta$ M

**C**

en-Gal4, UAS-RFP/+; Jub::*GFP*/+; UAS- $\alpha$ -Cat-RNAi(2)/ UAS- $\alpha$ -CatR- $\Delta$ M1

**D**

en-Gal4, UAS-RFP/+; Jub::*GFP*/+; UAS- $\alpha$ -Cat-RNAi(2)/ UAS- $\alpha$ -Cat- $\Delta$ M2

**E**

en-Gal4, UAS-RFP/+; Jub::*GFP*/+; UAS- $\alpha$ -Cat-RNAi(2)/ UAS- $\alpha$ -CatR- $\Delta$ M3

**F**

Same genotypes as in A-E.

**G**

en-Gal4, UAS-RFP/+; Jub::GFP/+  
*vinc102.1/Y*; Jub::GFP/+

**H**

en-Gal4, UAS-RFP/+; Jub::GFP/+  
*vinc102.1/Y*; Jub::GFP/+

**I**

en-Gal4, UAS-RFP/+  
*vinc102.1/Y*; Jub::GFP/+

**Fig 8****A**

en-Gal4, UAS-RFP/+; UAS- $\alpha$ -Cat-RNAi(2)/ UAS- $\alpha$ -CatR  
 en-Gal4, UAS-RFP/+; UAS- $\alpha$ -Cat-RNAi(2)/ UAS- $\alpha$ -CatR-H1  
 en-Gal4, UAS-RFP/+; UAS- $\alpha$ -Cat-RNAi(2)/ UAS- $\alpha$ -CatR- $\Delta\beta$ H  
 en-Gal4, UAS-RFP/+; UAS- $\alpha$ -Cat-RNAi(2)/ UAS- $\alpha$ -CatR-H1- $\Delta\beta$ H  
 en-Gal4, UAS-RFP/+; UAS- $\alpha$ -Cat-RNAi(1)/ UAS- $\alpha$ -CatR-3A  
 en-Gal4, UAS-RFP/+; UAS- $\alpha$ -Cat-RNAi(1)/ UAS- $\alpha$ -CatR- $\Delta$ ABD

**B**

Same genotypes as in A.

**C**

en-Gal4, UAS-RFP/+; Jub::GFP/+; UAS- $\alpha$ -Cat-RNAi(2)/ UAS- $\alpha$ -CatR-H1

**D**

en-Gal4, UAS-RFP/+; Jub::GFP/+; UAS- $\alpha$ -Cat-RNAi(2)/ UAS- $\alpha$ -CatR- $\Delta\beta$ H

**E**

en-Gal4, UAS-RFP/+; Jub::GFP/+; UAS- $\alpha$ -Cat-RNAi(2)/ UAS- $\alpha$ -CatR-H1- $\Delta\beta$ H

**F**

en-Gal4, UAS-RFP/+; Jub::GFP/+; UAS- $\alpha$ -Cat-RNAi(2)/ UAS- $\alpha$ -CatR  
 en-Gal4, UAS-RFP/+; Jub::GFP/+; UAS- $\alpha$ -Cat-RNAi(2)/ UAS- $\alpha$ -CatR-H1  
 en-Gal4, UAS-RFP/+; Jub::GFP/+; UAS- $\alpha$ -Cat-RNAi(2)/ UAS- $\alpha$ -CatR- $\Delta\beta$ H  
 en-Gal4, UAS-RFP/+; Jub::GFP/+; UAS- $\alpha$ -Cat-RNAi(2)/ UAS- $\alpha$ -CatR-H1- $\Delta\beta$ H

**Fig 9****A, B**

en-Gal4, UAS-RFP/+; Jub::GFP/+; UAS- $\alpha$ -Cat-RNAi(2)/ UAS- $\alpha$ -CatR  
 en-Gal4, UAS-RFP/+; Jub::GFP/+; UAS- $\alpha$ -Cat-RNAi(2)/ UAS- $\alpha$ -CatR- $\Delta$ M  
 en-Gal4, UAS-RFP/+; Jub::GFP/+; UAS- $\alpha$ -Cat-RNAi(2)/ UAS- $\alpha$ -CatR- $\Delta$ M1

en-Gal4, UAS-RFP/+; Jub::GFP/+; UAS- $\alpha$ -Cat-RNAi(2)/ UAS- $\alpha$ -CatR-H1

**C, D**

Same genotypes in A.

**S1 Fig**

**A**

hsFLP; Act<CD2<GAL4, UAS-GFP/+; UAS- $\alpha$ -Cat-RNAi(1)/+

**B**

hsFLP; Act<CD2<GAL4, UAS-GFP/+; UAS- $\alpha$ -Cat-RNAi(2)/+

**S2 Fig**

Whole animal rescue plotted for following genotypes:

$\alpha$ -Cat

act-Gal4, da-Gal4,  $\alpha$ -Cat/ $\alpha$ -Cat, UAS- $\alpha$ -CatR

act-Gal4, da-Gal4,  $\alpha$ -Cat/ $\alpha$ -Cat, UAS- $\alpha$ -CatR- $\Delta$ M

act-Gal4, da-Gal4, UAS-DEcad $\Delta\beta$ :: $\alpha$ -Cat $\Delta$ N

act-Gal4, da-Gal4,  $\alpha$ -Cat/ $\alpha$ -Cat, UAS-DEcad $\Delta\beta$ :: $\alpha$ -Cat $\Delta$ N

**S3 Fig**

**A**

en-Gal4, UAS-RFP/+

en-Gal4, UAS-RFP/+; UAS-crb-RNAi/+

en-Gal4, UAS-RFP/+; UAS- $\alpha$ -Cat/+

en-Gal4, UAS-RFP/+; UAS-crb-RNAi/UAS- $\alpha$ -Cat

**B**

en-Gal4, UAS-RFP/+

en-Gal4, UAS-RFP/+; UAS-ex-RNAi/+

en-Gal4, UAS-RFP/+; UAS- $\alpha$ -Cat/+

en-Gal4, UAS-RFP/+; UAS-ex-RNAi/UAS- $\alpha$ -Cat

**S4 Fig**

**A**

en-Gal4, UAS-RFP/+

**B**

en-Gal4, UAS-RFP/+; UAS- $\alpha$ -Cat-RNAi(2)/ UAS- $\alpha$ -CatR

**S5 Fig**

en-Gal4, UAS-RFP/+; UAS- $\alpha$ -Cat-RNAi(2)/ UAS- $\alpha$ -CatR

en-Gal4, UAS-RFP/+; UAS- $\alpha$ -Cat-RNAi(2)/ UAS- $\alpha$ -CatR- $\Delta$ M

en-Gal4, UAS-RFP/+; UAS- $\alpha$ -Cat-RNAi(2)/ UAS- $\alpha$ -CatR- $\Delta$ M1  
en-Gal4, UAS-RFP/+; UAS- $\alpha$ -Cat-RNAi(2)/ UAS- $\alpha$ -CatR- $\Delta$ M2  
en-Gal4, UAS-RFP/+; UAS- $\alpha$ -Cat-RNAi(2)/ UAS- $\alpha$ -CatR- $\Delta$ M3  
en-Gal4, UAS-RFP/+; UAS- $\alpha$ -Cat-RNAi(2)/ UAS- $\alpha$ -CatR-H1  
en-Gal4, UAS-RFP/+; UAS- $\alpha$ -Cat-RNAi(2)/ UAS- $\alpha$ -CatR- $\Delta$  $\beta$ H  
en-Gal4, UAS-RFP/+; UAS- $\alpha$ -Cat-RNAi(2)/ UAS- $\alpha$ -CatRH1- $\Delta$  $\beta$ H  
en-Gal4, UAS-RFP/+; UAS- $\alpha$ -CatR-3A/+  
en-Gal4, UAS-RFP/+; UAS- $\alpha$ -CatR- $\Delta$ ABD/+

### **S6 Fig**

#### **A**

omb-Gal4/+; UAS- $\alpha$ -CatR/+  
omb-Gal4/+; UAS- $\alpha$ -CatR- $\Delta$ M/+  
omb-Gal4/+; UAS- $\alpha$ -CatR- $\Delta$ M1/+  
omb-Gal4/+; UAS- $\alpha$ -Cat- $\Delta$ M2/+  
omb-Gal4/+; UAS- $\alpha$ -CatR- $\Delta$ M3/+

#### **B**

en-Gal4, UAS-RFP/+; UAS- $\alpha$ -CatR/+  
en-Gal4, UAS-RFP/+; UAS- $\alpha$ -CatR- $\Delta$ M1/+

#### **C**

en-Gal4, UAS-RFP/+; UAS- $\alpha$ -CatR/+  
en-Gal4, UAS-RFP/+; UAS- $\alpha$ -CatR- $\Delta$ M1/+

#### **D**

Same genotypes as listed in C.

### **S7 Fig**

en-Gal4, UAS-RFP, ex-lacZ/+  
en-Gal4, UAS-RFP, ex-lacZ/+; UAS- $\alpha$ -Cat-RNAi(2)/ UAS- $\alpha$ -CatR-H1
