# Supplementary material for: Role of α-Catenin and its mechanosensing properties in regulating Hippo/YAP-dependent tissue growth
Source: PubMed Central journal article supplement (PMC6863567; doi:10.1371/journal.pgen.1008454), 2019-11-07
Supplement: pgen.1008454.s009.pdf [file pgen.1008454.s009.pdf]

| <b>S2 Table</b>                                            |                                   |                        |               |                       |
|------------------------------------------------------------|-----------------------------------|------------------------|---------------|-----------------------|
| <b>Constructs</b>                                          | <b>Amino Acids (a-Catenin)</b>    | <b>Gateway cloning</b> | <b>HA tag</b> | <b>Reference</b>      |
| <b><math>\alpha</math>-Cat Full Length</b>                 |                                   |                        |               |                       |
| $\alpha$ -CatR                                             | 1-917                             | yes                    | yes           | this work             |
| $\alpha$ -Cat                                              |                                   | no                     | yes           | Desai et al., 2013    |
| <b>DEcad-<math>\alpha</math>Cat Fusion Constructs</b>      |                                   |                        |               |                       |
| DEcad                                                      | 0                                 | no                     | no            | Sarpal et al., 2012   |
| DEcad:: $\alpha$ -Cat                                      | 1-917                             | no                     | no            | Sarpal et al., 2012   |
| DEcad $\Delta\beta$ :: $\alpha$ -Cat $\Delta$ NT-N         | 281-917                           | no                     | no            | this work             |
| <b>M domain Constructs</b>                                 |                                   |                        |               |                       |
| $\alpha$ -CatR- $\Delta$ M                                 | 1-292 / 635-917                   | yes                    | yes           | this work             |
| $\alpha$ -CatR- $\Delta$ M1                                | 1-292 / 399 -917                  | yes                    | yes           | this work             |
| $\alpha$ -Cat- $\Delta$ M2 ( $\alpha$ -Cat- $\Delta$ VH2N) | 1-399 / 509-917                   | no                     | yes           | Desai et al., 2012    |
| $\alpha$ -CatR- $\Delta$ M3                                | 1-509 / 635-917                   | yes                    | yes           | this work             |
| <b>ABD Constructs</b>                                      |                                   |                        |               |                       |
| $\alpha$ -CatR-H1                                          | 683REAM > 683GSGS                 | yes                    | yes           | this work             |
| $\alpha$ -CatR- $\Delta\beta$ H                            | 1- 811/824-917                    | yes                    | yes           | Ishiyama et al., 2018 |
| $\alpha$ -CatR-H1- $\Delta\beta$ H                         | 1-811/824-917 + 683REAM > 683GSGS | yes                    | yes           | this work             |
| $\alpha$ -CatR-3A                                          | L798A + I805A + V809A             | yes                    | yes           | Ishiyama et al., 2018 |
| $\alpha$ -CatR- $\Delta$ ABD                               | 1-681                             | yes                    | yes           | this work             |
